# Supplementary material for: Dopamine replacement therapy modulates DDC, prolactin and AOC3 levels in Parkinson’s disease
Source: Research Square preprint supplement (doi:10.21203/rs.3.rs-7232697/v1), 2025-08-22
Supplement: Supplementary file 1 [file d77cf6c5d79e8aa0cdf7417c.docx]

**SUPPLEMENTARY MATERIAL**

*Supplementary Figures & Tables*


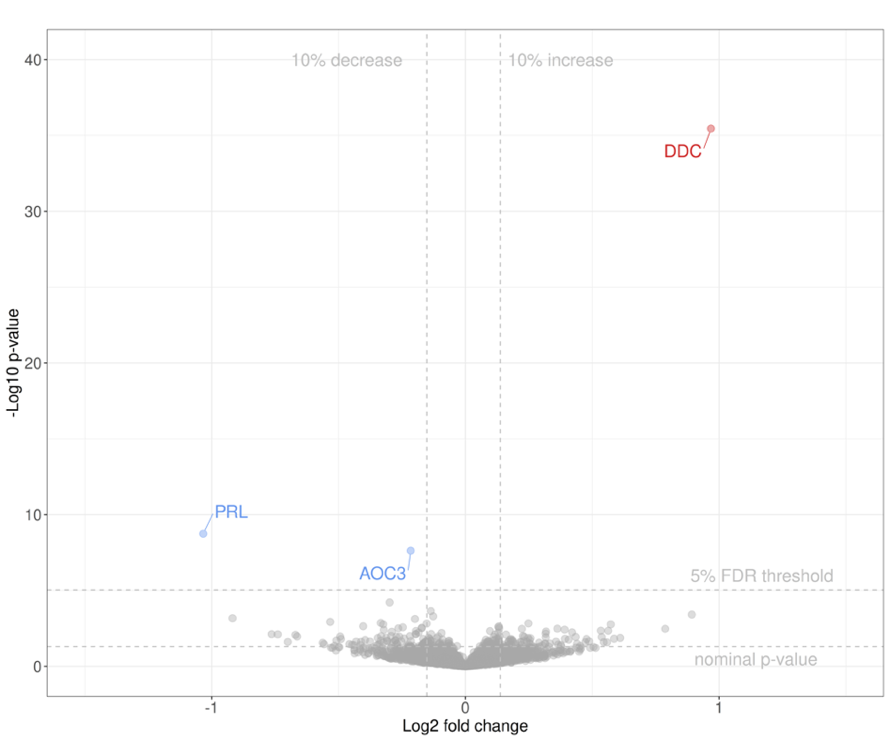
**Supplementary Figure 1. Proteins associated with DRT in serum**

*Simple linear model fitted to identify proteins associated with DRT at the baseline visit (covariates: diagnosis, sex, age, BMI, technical variables). DRT = Dopamine replacement therapy. DDC = dopa decarboxylase. PRL = prolactin. AOC3 = amine oxidase copper-containing 3*

**Supplementary Figure 2. Proteins associated with dopamine replacement therapy in CSF**


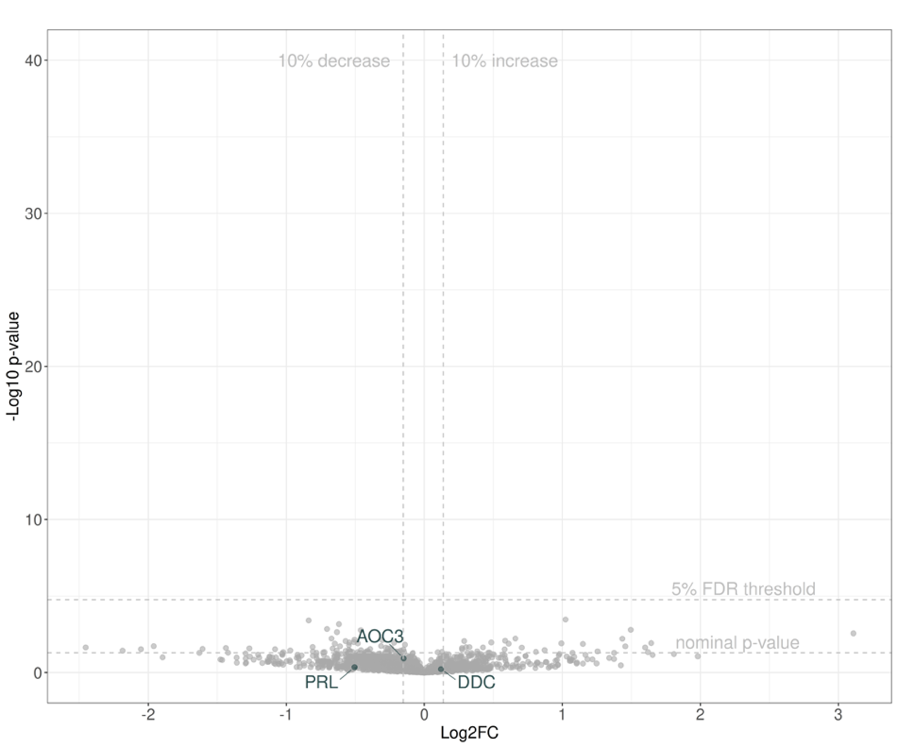


*Simple linear model fitted to identify proteins associated with DRT at the baseline visit (covariates: diagnosis, sex, age, BMI, technical variables). DRT = Dopamine replacement therapy. DDC = dopa decarboxylase. PRL = prolactin. AOC3 = amine oxidase copper-containing 3*

**Supplementary Table 1: Serum proteomic data: Overview of dopaminergic medication classes**

| **PD participants (baseline only)** | | |  | |  | |
| --- | --- | --- | --- | --- | --- | --- |
|  |  | |  | |  | |
| **Drug Class** | **Count** | | |
| Levodopa/PDI | 822 | | |
| Dopamine agonist | 411 | | |
| MAOB inhibitor | 368 | | |
| COMT inhibitor | 36 | | |
| Amantadine | 17 | | |
| **PD participants (baseline + follow-up)** | |
|  |  | |  | |  | |
| **Drug Class** | **Count** | | |
| Levodopa/PDI | 511 | | |
| Dopamine agonist | 263 | | |
| MAOB inhibitor | 251 | | |
| COMT inhibitor | 31 | | |
| Amantadine | 14 | | |
|  |  | | |  | |  |

**Supplementary Table 2: CSF proteomic data: Overview of dopaminergic medication classes**

| **PD participants (baseline)** |  |  | |  |
| --- | --- | --- | --- | --- |
|  |  |  | |  |
| **Drug Class** | **Count** | |
| Levodopa/PDI | 27 | |
| Dopamine agonist | 14 | |
| MAOB inhibitor | 12 | |
| COMT inhibitor | 1 | |
| Amantadine | 0 | |
|  |  | |

**Supplementary Figure 3: Correlation between serum and CSF NPX**


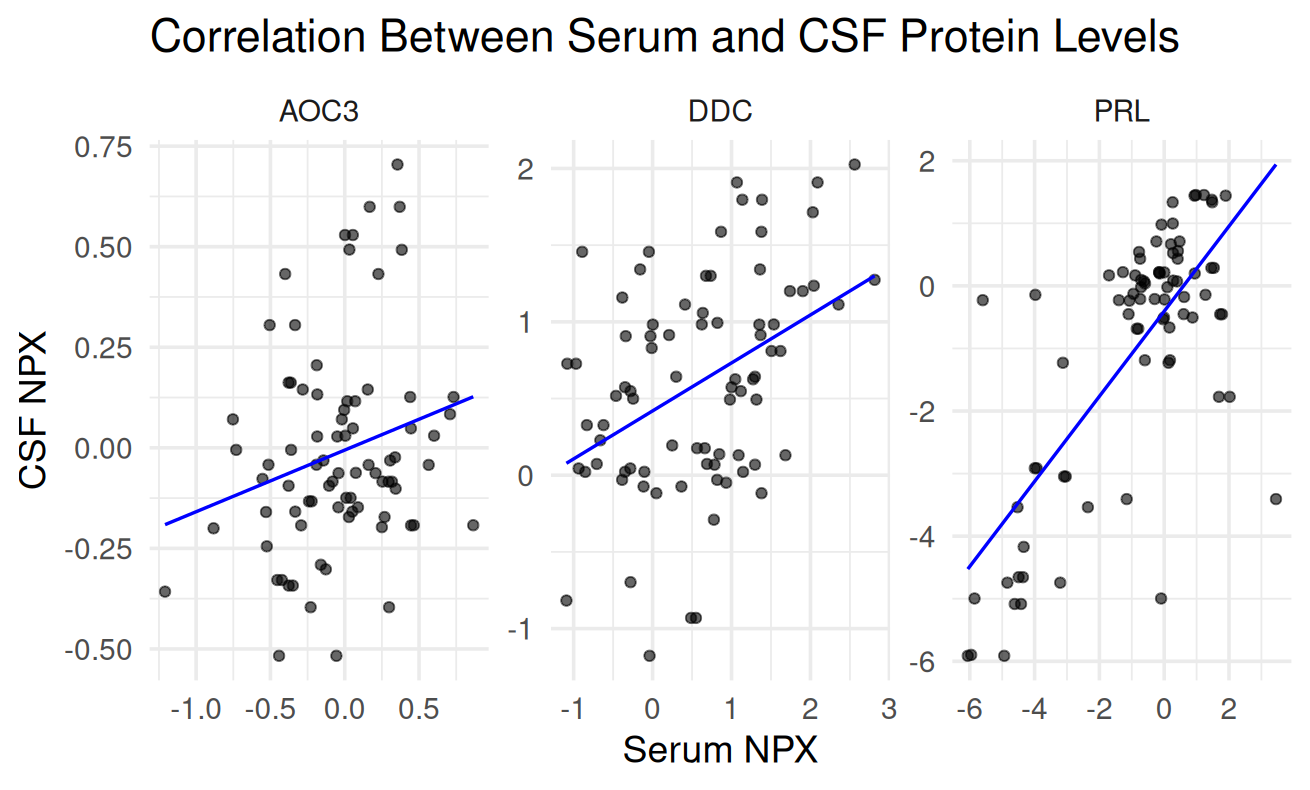


**Quality Control Summary**

**Supplementary Figure 4. Quality control flow diagram**

**Serum data**

**CSF data**

**Supplementary Figure 5. Extreme outlier detection**

**Outlier Detection**

Outliers in the serum proteomics dataset were identified using a combination of three complementary methods:

1. *Quality Control (QC) Plot Method:*

Outliers were defined as samples exceeding 5 standard deviations from the mean interquartile range (IQR) or sample median across all proteins. This approach identified 12 extreme outliers (**A**).

1. *Principal Component Analysis (PCA) – Mahalanobis Distance:*

PCA was performed on normalized protein expression (NPX) data, and Mahalanobis distance was used to identify statistical outliers with a confidence level of 99.999%, detecting 9 samples as outliers (**B**).

1. *PCA – Euclidean Distance from Centroid of Top Principal Components:*

The top 10 principal components were used to calculate each sample’s Euclidean distance from the centroid of the PD dataset. Samples exceeding 5 standard deviations from the mean distance were flagged, identifying another set of 9 outliers.

Following these assessments, a total of 16 unique outlier samples were removed (accounting for 5 overlaps between methods), and the final dataset was used for downstream analysis.


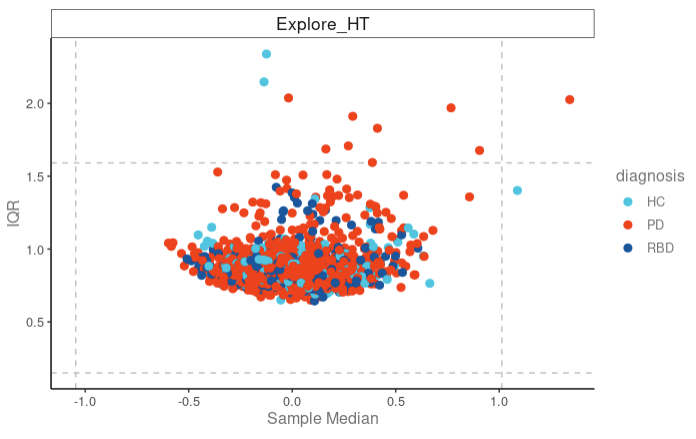


**A)**

**
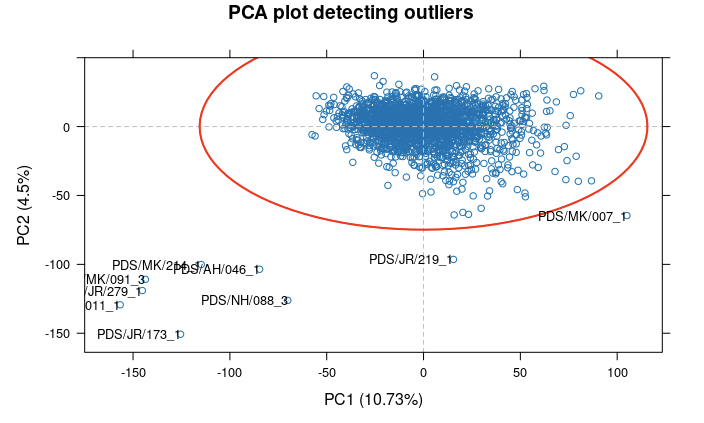
B)**
